# Supplementary material for: Elk3 Deficiency Causes Transient Impairment in Post-Natal Retinal Vascular Development and Formation of Tortuous Arteries in Adult Murine Retinae
Source: PubMed Central journal article supplement (PMC4159304; doi:10.1371/journal.pone.0107048), 2014-09-09

# Figure S7

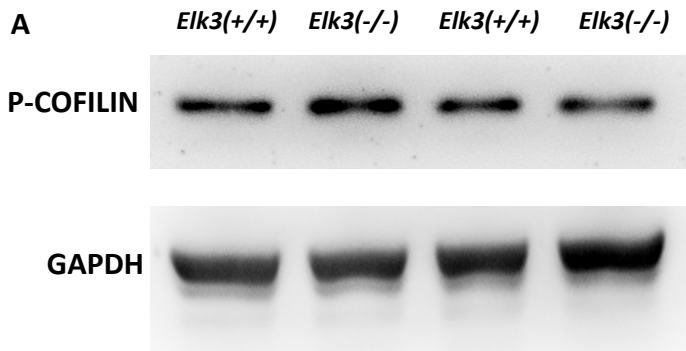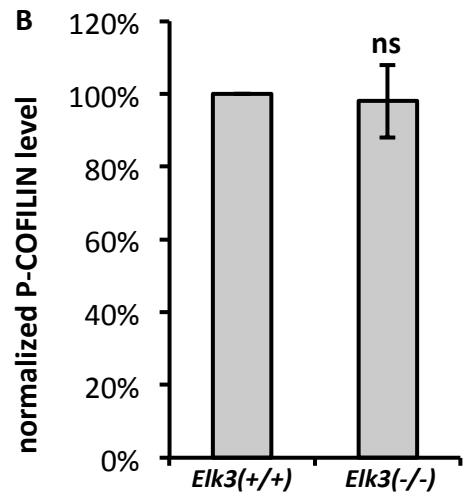

Supplement: pone.0107048.s007.pdf [file pone.0107048.s007.pdf]
