# Supplementary material for: Elk3 Deficiency Causes Transient Impairment in Post-Natal Retinal Vascular Development and Formation of Tortuous Arteries in Adult Murine Retinae
Source: PubMed Central journal article supplement (PMC4159304; doi:10.1371/journal.pone.0107048), 2014-09-09
Supplement: pone.0107048.s008.pdf [file pone.0107048.s008.pdf]

**Table S1: Primer sequences for qRT-PCR**

| <b>Primer Sequences for qRT-PCR</b>                |                                                     |
|----------------------------------------------------|-----------------------------------------------------|
| Gapdh fw: TGG ATC TGA CGT GCC GC                   | Gapdh rev: TGC CGT CTT CAC CAC CTT C                |
| Srf fw: CAC GAC CTT CAG CAA GAG GAA                | Srf rev: CAA AGC CAG TGG CAC TCA TTC                |
| $\beta$ -actin fw: AGA GAG GTA TCC TGA CCC TGA AGT | $\beta$ -actin rev: CAC GCA GCT CAT TGT AGA AGG TGT |
| c-fos fw CTT GCC CCT TCT CAA CGA                   | c-fos rev: GCT CCA CGT TGC TGA TGC T                |
| Vegf-r2 fw: GAT GCC CGA CTC CCT TTG A              | Vegf-r2 rev: CGA AAG ACC ACA CAT CGC TCT            |
| Vegf-r1 fw: AGC CTA CCT CAC CGT GCA AG             | Vegf-r1 rev: AAA AGA GGG TCG CAG CCA C              |
| Vegf-a fw: TCA CCA AAG CCA GCA CAT AG              | Vegf-a rev: TTG ACC CTT TCC CTT TCC TC              |
| Elk3 fw: CTCAGGATCCCTCACTCCAG                      | Elk3 rev: GGCATGTGACCGTTGAGCAG                      |
| Egr-1 fw: GCC GAG CGA ACA ACC CTA T                | Egr-1 rev: TCC ACC ATC GCC TTC TCA TT               |
| Egr-2 fw: GTT GAC TGT CAC TCC AAG AAA TGG          | Egr-2 rev: AGC GCA GCC CTG TAG GC                   |
| CollagenIV fw: CGGAGGAAGAAACTGCTCTG                | CollagenIV rev: CACCAGTTGGACCCTTGTCT                |
| Elk1 fw: TGCTCCCCACACATACCTTGA                     | Elk1 rev: ACTGGACGGAAACTGGAAGGA                     |
| Elk4 fw: GTGACAACGCCTGCCAAAA                       | Elk4 rev: GCCAGAATGGATATGGAGGCT                     |
| Ang-1 fw: AGCTACCAACAACAACAGCA                     | Ang-1 rev: GCAAAGGCTGATAAGGTTATGA                   |
| Ang-2 fw: AGCCACGGTCAACAACCTCGC                    | Ang-2 rev: TTCTTCTTTACGGATAGCAAC                    |
| Tie-1 fw: CCCCACTGGTCTCCTTTAG                      | Tie-1 rev: AATGGCAGACCAGGCAATC                      |
| Tie-2 fw: GAAGTCGAGAGGCGATCCC                      | Tie-2 rev: GTTGA CTCTAGCTCGGACTGT                   |
