# Supplementary material for: Elk3 Deficiency Causes Transient Impairment in Post-Natal Retinal Vascular Development and Formation of Tortuous Arteries in Adult Murine Retinae
Source: PubMed Central journal article supplement (PMC4159304; doi:10.1371/journal.pone.0107048), 2014-09-09
Supplement: pone.0107048.s009.pdf [file pone.0107048.s009.pdf]

**Table S2: Measurement of proliferation via Ki67 and ILB4 co-staining on P6 and measurement of blood vessel width on ILB4 stained P6 and P8 P6 *Elk3(+/+)* wildtype and *Elk3(-/-)* knockout retinal flat-mount preparations**

|                                                 |                 | <b>Ki67 positive endothelial cells / 100 <math>\mu</math>m</b> |                                                 |
|-------------------------------------------------|-----------------|----------------------------------------------------------------|-------------------------------------------------|
|                                                 |                 | <i>Elk3(+/+)</i><br>(n=9 retinae)                              | <i>Elk3(-/-)</i><br>(n=10 retinae)              |
| <b>P6 arteries</b>                              |                 | 100%<br>(42 arteries)                                          | 98.75% ( $\pm$ 9.8%) p=0.91 ns<br>(45 arteries) |
| <b>P6 veins</b>                                 |                 | 100%<br>(39 veins)                                             | 92% ( $\pm$ 4.7%) p=0.19 ns<br>(45 veins)       |
|                                                 |                 | <b>Measurement of blood vessel width</b>                       |                                                 |
| <b>P6</b><br>(19 WT retinae)<br>(17 KO retinae) | <b>arteries</b> | 100%<br>(96 arteries)                                          | 106% ( $\pm$ 3%) p=0.14 ns<br>(84 arteries)     |
|                                                 | <b>veins</b>    | 100%<br>(81 veins)                                             | 96.7% ( $\pm$ 4%) p=0.45 ns<br>(87 veins)       |
| <b>P8</b><br>(8 WT retinae)<br>(10 KO retinae)  | <b>arteries</b> | 100%<br>(33 arteries)                                          | 101% ( $\pm$ 5%) p=0.77 ns<br>(38 arteries)     |
|                                                 | <b>veins</b>    | 100%<br>(25 veins)                                             | 95% ( $\pm$ 3%) p=0.08 ns<br>(38 veins)         |
