# Supplementary material for: Elk3 Deficiency Causes Transient Impairment in Post-Natal Retinal Vascular Development and Formation of Tortuous Arteries in Adult Murine Retinae
Source: PLOS journal article supplement (doi:10.1371/journal.pone.0107048), 2014-09-09
Supplement: S2 (10.1371/journal.pone.0107048.s002) [file journal.pone.0107048.s002]

## Figure S2

*Elk3(+/+)*

ILB4

*Elk3(-/-)*

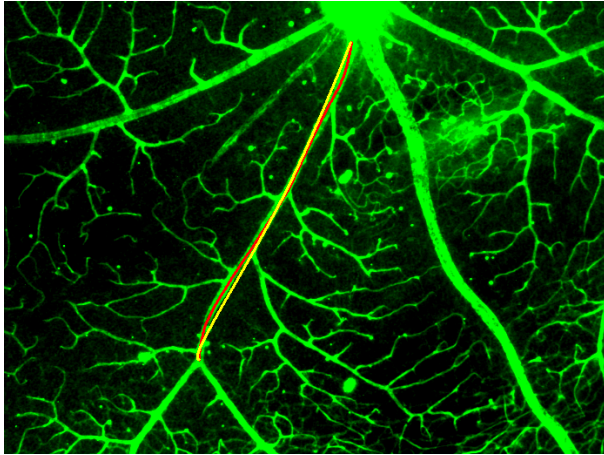

834  $\mu\text{m}$ , 833  $\mu\text{m}$   
tortuosity factor = 1,001

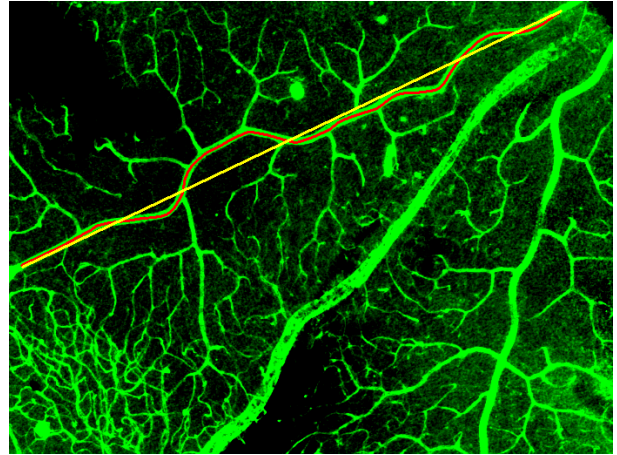

1516  $\mu\text{m}$ , 1423  $\mu\text{m}$   
tortuosity factor = 1,065

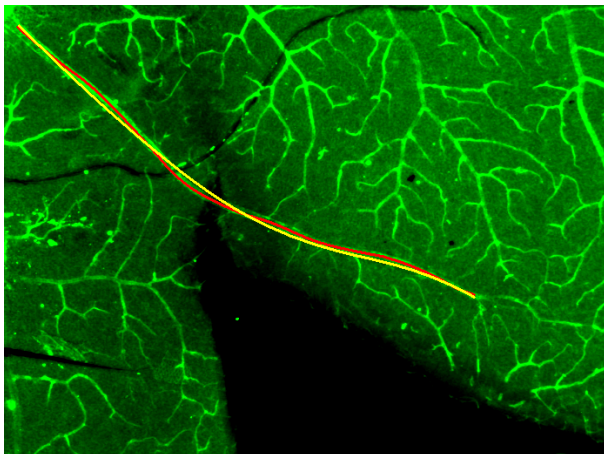

1547  $\mu\text{m}$ , 1539  $\mu\text{m}$   
tortuosity factor = 1,005

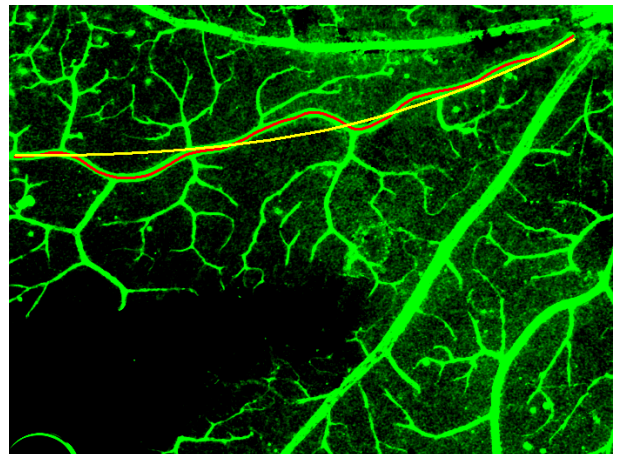

1388  $\mu\text{m}$ , 1326  $\mu\text{m}$   
tortuosity factor = 1,047
